# Supplementary material
Source: PubMed Central journal article supplement (PMC6675574)
Supplement: NIHMS1035098-supplement-Supplemental_Material.pdf [file NIHMS1035098-supplement-Supplemental_Material.pdf]

Supplementary Table 1

*Fit Indices for Invariance Tests of the LOT*

| Model Tested           | $\chi^2$ | df | p     | RMSEA | RMSEA         |  | CFI  | $\Delta$ CFI | TLI  | $\Delta$ TLI | Pass? |
|------------------------|----------|----|-------|-------|---------------|--|------|--------------|------|--------------|-------|
|                        |          |    |       |       | 95%           |  |      |              |      |              |       |
| Model 1:<br>Configural | 1096.080 | 18 | <.001 | .157  | .149;<br>.165 |  | .865 | ---          | .775 | ---          | Yes   |
| Model 2:<br>Metric     | 1210.258 | 23 | <.001 | .146  | .139;<br>.153 |  | .852 | .013         | .806 | .031         | Yes   |
| Model 3:<br>Scalar     | 1510.759 | 28 | <.001 | .148  | .141;<br>.154 |  | .815 | .037         | .801 | .005         | No    |

Note. \* $p$ <.05. \*\* $p$ <.001.

Supplementary Table 2

*Fit Indices for Invariance Tests of the revised Neuroticism scale*

| Model Tested           | $\chi^2$ | df | p     | RMSEA | RMSEA         |  | CFI  | $\Delta$ CFI | TLI   | $\Delta$ TLI | Pass? |
|------------------------|----------|----|-------|-------|---------------|--|------|--------------|-------|--------------|-------|
|                        |          |    |       |       | 95%           |  |      |              |       |              |       |
| Model 1:<br>Configural | 0        | 0  | <.001 | 0     | 0; 0          |  | 1    | ---          | 1     | ---          | Yes   |
| Model 2:<br>Metric     | 1.138    | 2  | 0.566 | 0     | 0; .034       |  | 1    | 0            | 1.001 | .001         | Yes   |
| Model 3:<br>Scalar     | 81.902   | 4  | <.001 | .090  | .073;<br>.107 |  | .975 | .025         | .963  | .038         | No    |

Note. \* $p$ <.05. \*\* $p$ <.001.

Supplementary Table 3

*Fit Indices for Invariance Tests of the revised Extraversion scale*

| Model Tested           | $\chi^2$ | df | p     | RMSEA | RMSEA         |  | CFI  | $\Delta$ CFI | TLI   | $\Delta$ TLI | Pass? |
|------------------------|----------|----|-------|-------|---------------|--|------|--------------|-------|--------------|-------|
|                        |          |    |       |       | 95%           |  |      |              |       |              |       |
| Model 1:<br>Configural | 0        | 0  | <.001 | 0     | 0; 0          |  | 1    | ---          | 1     | ---          | Yes   |
| Model 2:<br>Metric     | 1.058    | 2  | .589  | 0     | 0; .033       |  | 1    | 0            | 1.001 | .001         | Yes   |
| Model 3:<br>Scalar     | 46.468   | 4  | <.001 | .066  | .050;<br>.084 |  | .987 | .013         | .981  | .02          | Yes   |

Note. \* $p$ <.05. \*\* $p$ <.001.

Supplementary Table 4

*Multilevel Models Predicting Past, Present, and Future Life Satisfaction by Five Age Ranges and Nationality Using the Original Neuroticism and Extraversion Scales*

| Variable                             | Perceived Life Satisfaction without Covariates |           | Perceived Life Satisfaction with Covariates |           |
|--------------------------------------|------------------------------------------------|-----------|---------------------------------------------|-----------|
|                                      | <i>b</i> ( <i>SE</i> )                         | <i>df</i> | <i>b</i> ( <i>SE</i> )                      | <i>df</i> |
| Intercept                            | 6.57 ( 0.05 )**                                | 4844      | 6.10 ( 0.06 ) **                            | 4753      |
| Gender, female (ref=male)            |                                                |           | 0.18 ( 0.04 ) **                            | 4753      |
| Number of Chronic Conditions         |                                                |           | -0.09 ( 0.02 ) **                           | 4753      |
| Marital Status, married (ref=Single) |                                                |           | 0.61 ( 0.04 ) **                            | 4753      |
| Education (Z-score)                  |                                                |           | 0.04 ( 0.02 ) *                             | 4753      |
| Centered Neuroticism                 |                                                |           | -0.25 ( 0.03 ) **                           | 4753      |
| Centered Extraversion                |                                                |           | 0.51 ( 0.03 ) **                            | 4753      |
| Centered Life Orientation            |                                                |           | 0.07 ( 0.005 ) **                           | 4753      |
| Nationality, Japan (ref=U.S.)        | -0.71 ( 0.11 ) **                              | 4844      | -0.08 ( 0.10 )                              | 4753      |
| Time                                 | 1.06 ( 0.03 ) **                               | 9632      | 1.05 ( 0.03 ) **                            | 9467      |
| Nationality*Time                     | -0.65 ( 0.06 ) **                              | 9632      | -0.63 ( 0.06 ) **                           | 9467      |
| Age Range                            | 0.49 ( 0.02 ) **                               | 4844      | 0.47 ( 0.02 ) **                            | 4753      |
| Nationality*Age Range                | -0.22 ( 0.05 ) **                              | 4844      | -0.20 ( 0.05 ) **                           | 4753      |
| Time*Age Range                       | -0.41 ( 0.01 ) **                              | 9632      | -0.40 ( 0.01 ) **                           | 9467      |
| Nationality*Time*Age Range           | 0.07 ( 0.03 ) *                                | 9632      | 0.06 ( 0.03 ) *                             | 9467      |

*Note.*  $p < .05$ , \*  $p < .001$ \*\*. Standard Errors are indicated by the parentheses.
